# Supplementary material for: The plant cytosolic m6A RNA methylome stabilizes photosynthesis in the cold
Source: PubMed Central journal article supplement — Plant Commun. 2023 Jun 7;4(6):100634. doi: 10.1016/j.xplc.2023.100634 (PMC10721483; doi:10.1016/j.xplc.2023.100634), 2023-06-07
Supplement: mmc1.pdf [file mmc1.pdf]

**Plant Communications, Volume 4**

**Supplemental information**

**The plant cytosolic m<sup>6</sup>A RNA methylome stabilizes photosynthesis in the cold**

**Alexandre Magno Vicente, Nikolay Manavski, Paul Torben Rohn, Lisa-Marie Schmid, Antoni Garcia-Molina, Dario Leister, Charlotte Seydel, Leo Bellin, Torsten Möhlmann, Gregor Ammann, Stefanie Kaiser, and Jörg Meurer**

**Plant Communications**

**Supplemental information**

**The plant cytosolic m<sup>6</sup>A RNA methylome stabilizes photosynthesis in the cold**

**Alexandre Magno Vicente, Nikolay Manavski, Paul Torben Rohn, Lisa-Marie Schmid, Antoni Garcia-Molina, Dario Leister, Charlotte Seydel, Leo Bellin, Torsten Möhlmann, Gregor Ammann, Stefanie Kaiser, Jörg Meurer**

**Supplemental Figures 1-7**

**Supplemental Tables 1-2**

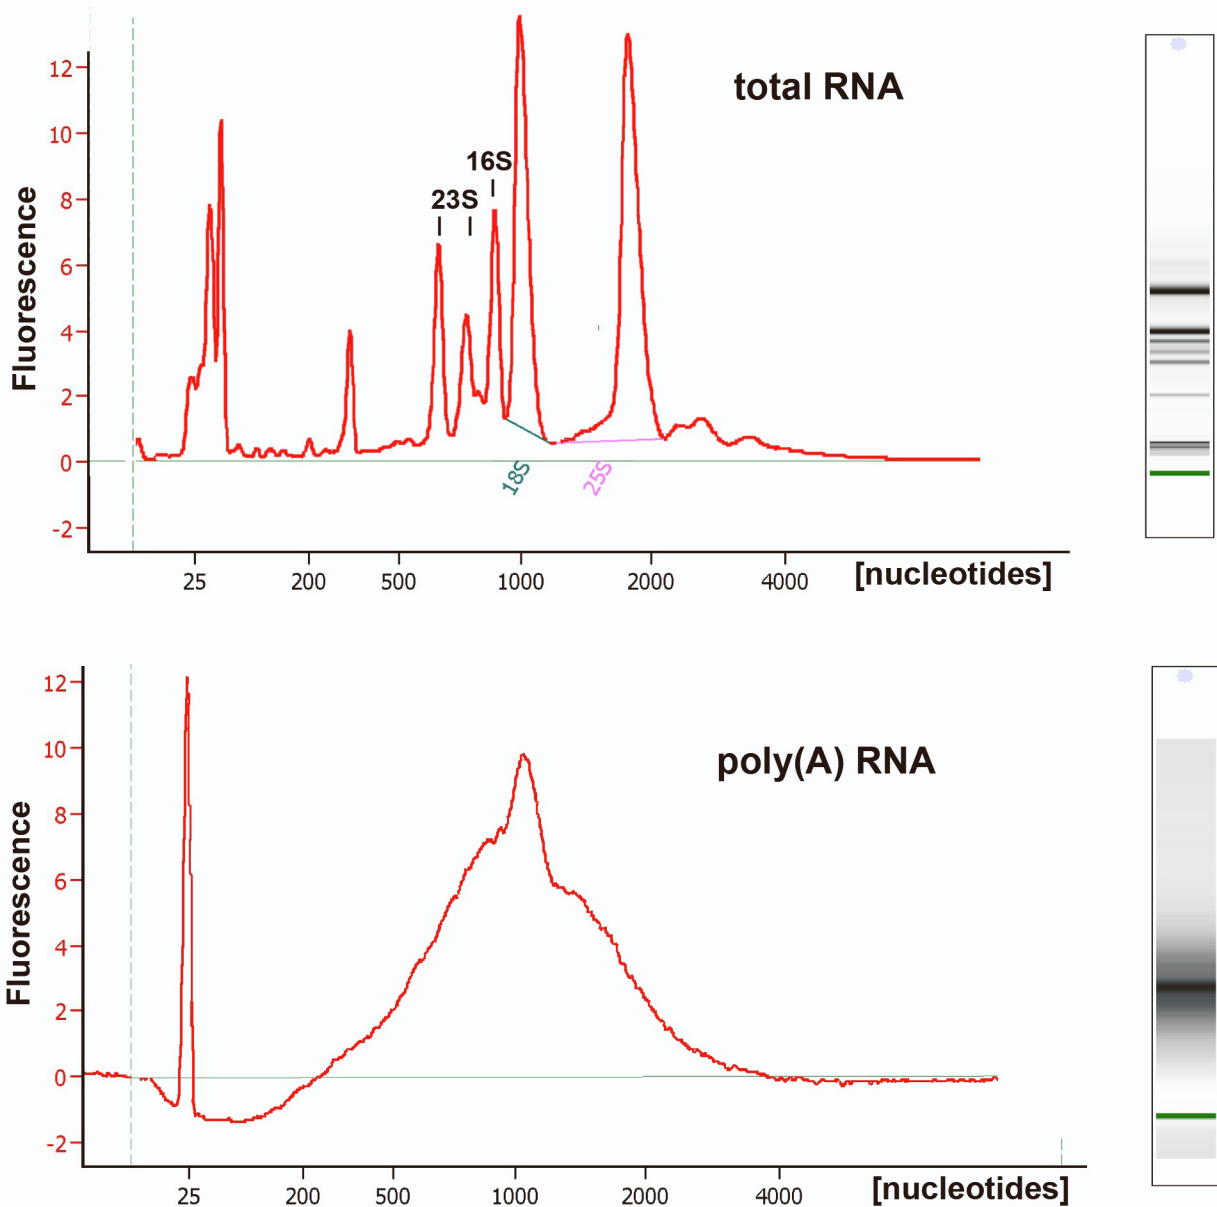

### Supplemental Figure S1. Quality control of enriched poly(A)-RNA

Bioanalyzer electropherograms (RNA Pico 6.000) show representative samples of total (upper part) and poly(A)-enriched (lower part) RNAs used for  $m^6A$  quantification. Cellular rRNAs in total RNAs and their depletion in poly(A)-enriched RNA samples are shown. The presence of cytoplasmic 25S and 18S, and plastid 16S and 23S rRNA peaks indicated good integrity of RNAs. The corresponding virtual gels are shown on the right.

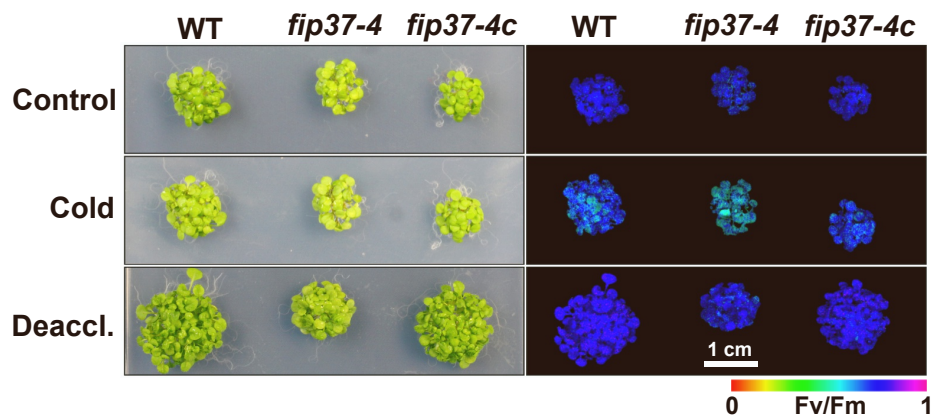

**Supplemental Figure S2. FIP37 deficiency strongly but reversibly affects photosynthesis during cold treatment**

The left part shows the visible phenotype of WT, *fip37-4*, and *fip37-4c* grown in vitro for 10 days under standard condition followed by 4 days in the cold and another 4 days of deacclimation. Corresponding chlorophyll fluorescence images reflecting Fv/Fm values are shown on the right. Scale bar: 1 cm.

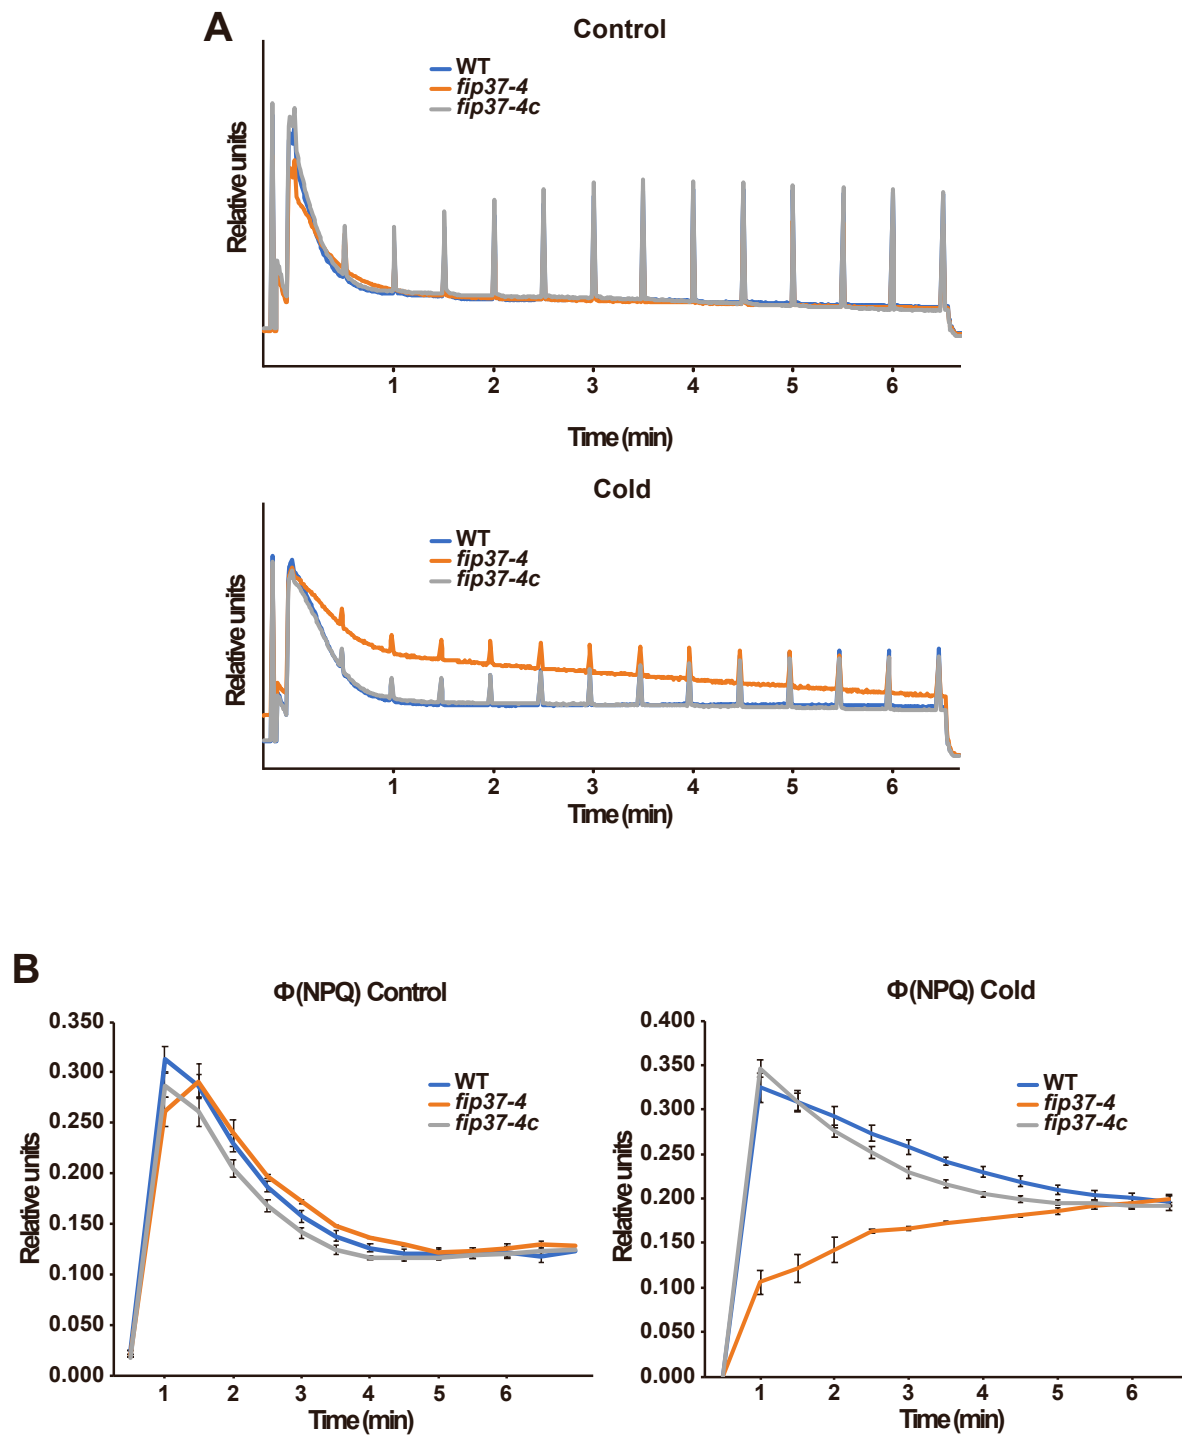

**Supplemental Figure S3. Spectroscopic analysis of WT, *fip37-4*, and *fip37-4c***

(A) Representative chlorophyll fluorescence induction analysis of WT, *fip37-4*, and *fip37-4c* lines grown for 10 days under control and additional 4 days under cold conditions on soil. The actinic light intensity was set to  $80 \mu\text{mol photons m}^{-2} \text{s}^{-1}$  and consecutive saturation pulses were applied every 30 s.

(B) The corresponding course of  $\Phi(\text{NPQ})$  during induction of plants grown under standard and cold conditions is shown.

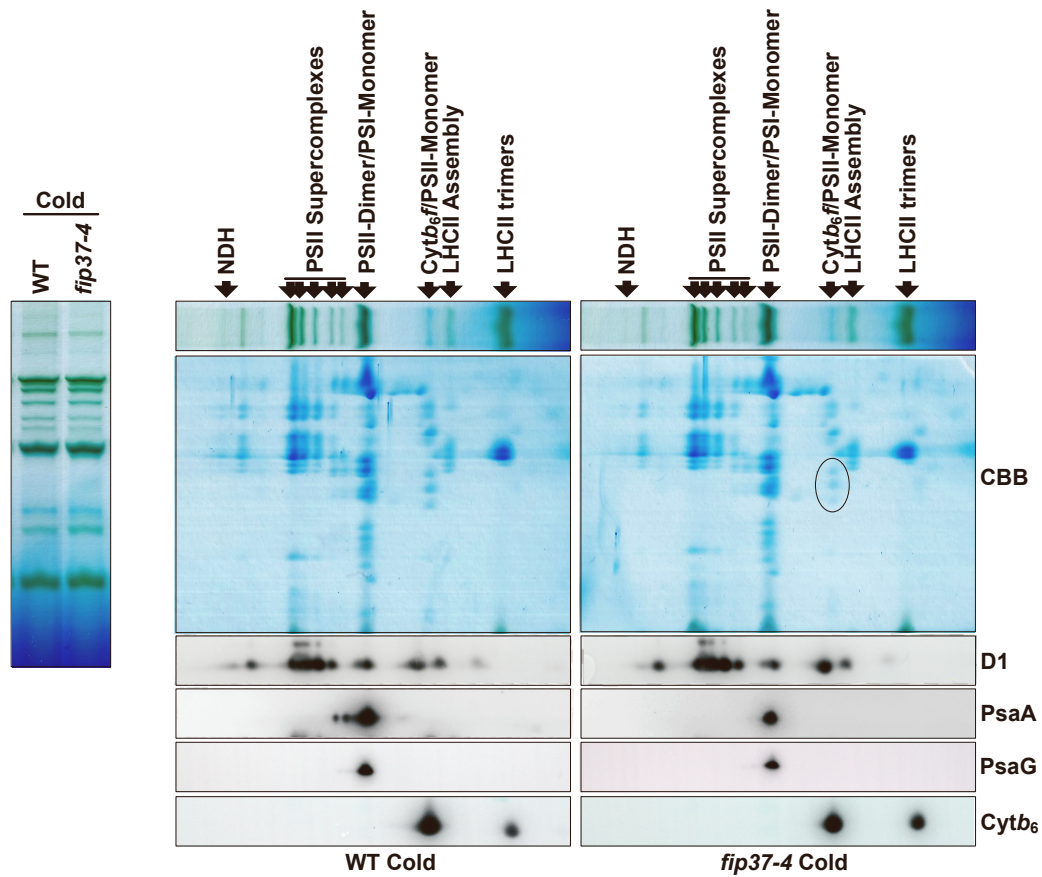

**Supplemental Figure S4. Analysis of thylakoid membrane complexes using BN-PAGE**

Loading of thylakoid complexes was based on equal amount of chlorophyll. The first dimension was performed using BN-PAGE of solubilized thylakoid membrane complexes of WT and mutant plants grown under cold conditions (left part). The appearing protein complexes are indicated (right upper part). Proteins in the second dimension were stained with Coomassie Brilliant Blue (CBB) (right middle part). The *Cytb<sub>6</sub>* complex is circled. The second dimension was subjected to immunodecoration using D1, PsaA, PsaG, and *Cytb<sub>6</sub>* sera (right lower part).

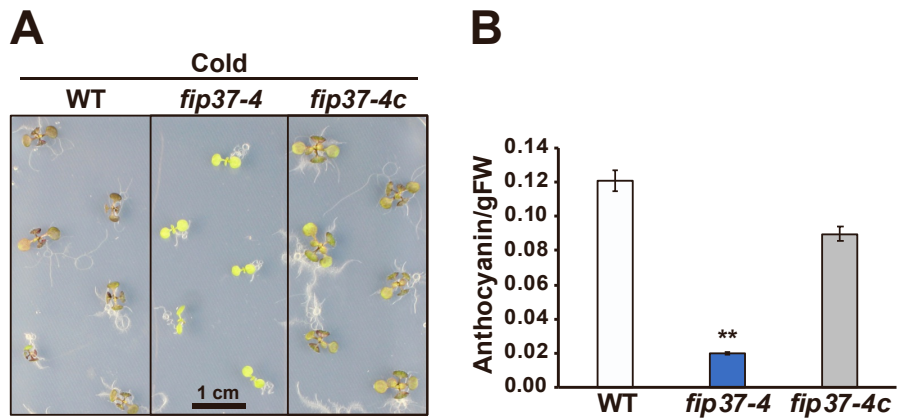

**Supplemental Figure S5. FIP37 is important for anthocyanin production in the cold (A)** Phenotype of WT, *fip37-4*, and *fip37-4c* grown in vitro at 22°C for 7 days followed by a shift to 4°C for 30 days.

**(B)** Anthocyanin content in WT, *fip37-4*, and *fip37-4c* after cold treatment. 15 replicates for each genotype were measured. Statistical significance was determined using Tukey HSD. \*\* corresponds to a p-value  $\leq 0.01$ . Fresh weight: FW. Scale bar: 1 cm.

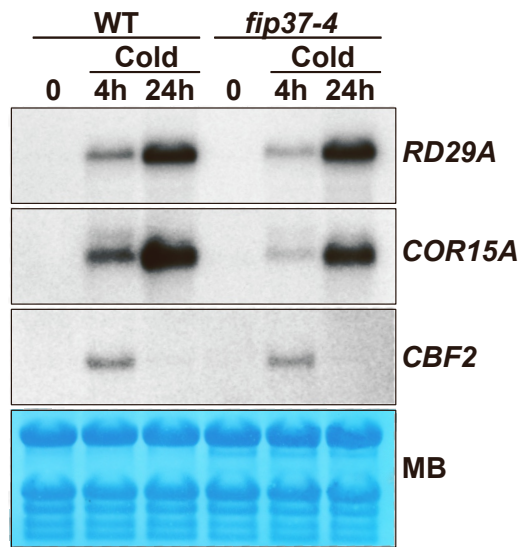

**Supplemental Figure S6. Reduced levels of FIP37 has no significant impact on the expression of cold-responsive genes**

RNA gel blot analysis of *CBF2*, *COR5A*, and *RD29A* genes in the WT and *fip37-4* before (time 0) and after 4 and 24 hours of cold treatment. 8  $\mu$ g of RNAs from leaves were used. Methylene blue (MB) was used as loading control.



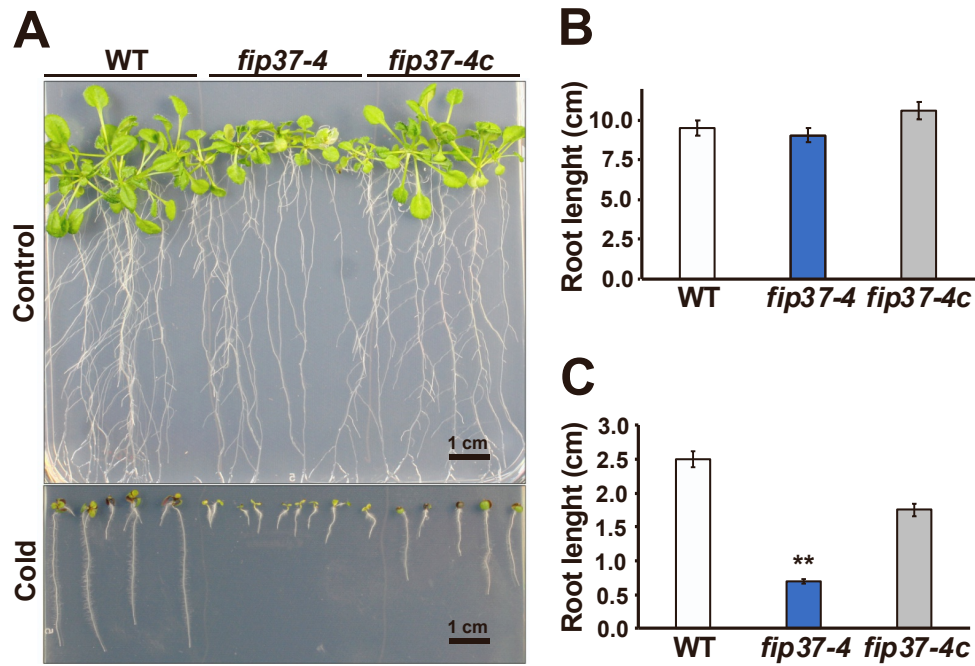

**Supplemental Figure S7. Cold-sensitive root growth in *fip37-4***

**(A)** Phenotype of WT, *fip37-4*, and *fip37-4c* grown vertically on MS medium for 21 days under control conditions (upper part) and after germination for 30 days at 4°C (lower part). Scale bar: 1 cm.

**(B and C)** Graphs show root lengths of plants grown under control **(B)** and cold **(C)** conditions. 25 replicates for each genotype were measured. Statistical significance was determined using Tukey HSD. \*\* corresponds to a p-value  $\leq 0.01$ .

**Supplemental Table S1. List of putative epitranscriptomic players with chloroplast localization or functional association**

The functions of potential epitranscriptomic factors were retrieved from TAIR, INTERPRO, or the STRING database (arabidopsis.org, ebi.ac.uk, string-db.org, respectively). The putative subcellular localization was estimated by ARAMEMNON (aramemnon.uni-koeln.de). The consensus score AramLocCon is indicated. The tissue with highest expression levels was taken from the Arabidopsis eFP Browser (<http://bar.utoronto.ca>). The DOI numbers of latest references (TAIR) dealing either specifically or generally with the factors is listed. Interaction partners were predicted using the STRING and the Biogrid (thebiogrid.org) database.

| Gene name                                                | Tentative function                                                                                 | Subcellular localisation and consensus score                                                                    | Mainly expressed in:                                                     | References/DOI                    | Interactions                                                                                                                                                                                                                                                        |
|----------------------------------------------------------|----------------------------------------------------------------------------------------------------|-----------------------------------------------------------------------------------------------------------------|--------------------------------------------------------------------------|-----------------------------------|---------------------------------------------------------------------------------------------------------------------------------------------------------------------------------------------------------------------------------------------------------------------|
| <b>black, writers<br/>red, readers<br/>blue, erasers</b> | <b>Interpro<br/>(www.ebi.ac.uk)<br/>String (string-<br/>db.org)<br/>TAIR<br/>(arabidopsis.org)</b> | <b>AramLocCon<br/>(aramemnon.uni-<br/>koeln.de)<br/><br/>c, chloroplast<br/>m, mitochondrium<br/>n, nucleus</b> | <b>Arabidopsis<br/>eFP<br/>Browser<br/>(http://bar.<br/>utoronto.ca)</b> | <b>TAIR<br/>(arabidopsis.org)</b> | <b>String<br/>(string-db.org)<br/><br/>Biogrid<br/>(thebiogrid.org)</b>                                                                                                                                                                                             |
| <b>AT1G01860</b>                                         | PFC1, chloroplast Ribosomal RNA adenine dimethylase family protein                                 | c 21.1                                                                                                          | Leaves                                                                   | 10.1105/tpc.10.5.699              | AT4G26600, methyltransferase activity, RNA binding; Involved in rRNA processing; AT3G13230, RNA-binding KH domain-containing protein; AT3G11964, rRNA biogenesis protein <i>rrp5</i>                                                                                |
| <b>AT1G06560</b>                                         | putative NSUN 5-methylcytosine RNA methyltransferase (AtNOP2c); rRNA processing                    | c 1.9, n 3.9                                                                                                    | Leaves                                                                   | 10.1186/s12870-017-1206-0         | AT5G04600, RNA-binding (RRM/RBD/RNP motifs) family protein                                                                                                                                                                                                          |
| <b>AT1G12800</b>                                         | chloroplast localized S1 RNA binding protein, OB-fold-like protein                                 | c 21.8                                                                                                          | Leaves                                                                   | 10.1111/tpj.12889                 | At1G63310, Uncharacterized protein; AT1G06720, GTPase activity; Involved in ribosome biogenesis; AT3G06530, Involved in ribosome biosynthesis ; AT4G04940, Transducin family protein / WD-40 repeat family protein; Its function is described as nucleotide binding |
| <b>AT1G31600</b>                                         | RNA-binding (RRM/RBD/RNP motifs) family protein                                                    | c 1.9, n 3.7                                                                                                    | Leaves                                                                   | 10.1093/nar/gkr406                | At1G78190, Multifunctional methyltransferase subunit TRM112-like protein; Acts as an activator of both RNA and protein methyltransferases                                                                                                                           |

|                  |                                                                                  |                |                           |                                                   |                                                                                                                                                                                                                                           |
|------------------|----------------------------------------------------------------------------------|----------------|---------------------------|---------------------------------------------------|-------------------------------------------------------------------------------------------------------------------------------------------------------------------------------------------------------------------------------------------|
| <b>AT1G32360</b> | RNA binding zinc finger (CCCH-type) family protein                               | n 8.5          | Leaves, seeds             | 10.3390/ijms23031572                              | AT2G04080, MATE efflux family protein; AT5G13570, mRNA-decapping enzyme subunit 2                                                                                                                                                         |
| <b>AT1G36310</b> | S-adenosyl-L-methionine-dependent tRNA methyltransferases superfamily protein    | c 4.8, m 8.6   | Leaves                    | 10.1093/nar/gkr406                                | At1G78190, Acts as an activator of both RNA and protein methyltransferases                                                                                                                                                                |
| <b>AT1G45110</b> | Ribosomal RNA small subunit methyltransferase I (RsmI)                           | c 9.4, m 11.5  | Leaves                    | 10.1104/pp.105.066290                             | At5G10620, Putative plastid RNA methyltransferase; AT2G02740, WHIRLY 3, plastid, DNA binding                                                                                                                                              |
| <b>AT1G50000</b> | RNA Methyltransferase; Involved in rRNA processing                               | c 16.6, m 11.4 | Leaves                    | 10.1093/jxb/erx082                                | AT5G53920; Ribosomal protein L11 methyltransferase-related; AT1G45110, 16S rRNA (cytidine1402-2'-O)-methyltransferase                                                                                                                     |
| <b>AT1G55500</b> | putative mRNA methylation-of-N6-adenosine reader protein (AtECT4)                | c, 0.2, n 6.6  | Flowers, meristem, leaves | 10.1080/15592324.2022.2079308; 10.1242/dev.189134 | AT3G27700 and AT1G21580; RNA recognition motif (RRM)-containing protein; Its function is described as RNA binding, nucleotide binding, zinc ion binding, nucleic acid binding; AT3G54170, FIP37; AT4G10760, MTA                           |
| <b>AT1G60230</b> | putative (bacteria RlmN/CFR)-like dual-specificity rRNA & tRNA methyltransferase | c 14.7, m 7.5  | Leaves                    | 10.1093/jxb/erx082                                | AT4G01850, S-adenosylmethionine synthetase 2                                                                                                                                                                                              |
| <b>AT1G69523</b> | S-adenosyl-L-methionine-dependent methyltransferases superfamily protein         | c 16.9; n 2.4  | Leaves                    | 10.1104/pp.108.121038                             | AT1G71370, DEA(D/H)-box RNA helicase family protein; AT5G64150, RNA methyltransferase family protein; AT5G05450, P-loop containing nucleoside triphosphate hydrolases superfamily protein. Its function is described as helicase activity |
| <b>AT1G69526</b> | S-adenosyl-L-methionine-dependent methyltransferases superfamily protein         | c 13.7, 11.5   | Seeds                     | 10.1104/pp.108.121038                             | AT5G64150, RNA methyltransferase family protein; AT3G17390, S-adenosylmethionine synthetase family protein                                                                                                                                |

|                  |                                                                                                     |                |                                 |                              |                                                                                                                                                                                                                                                                                                                                                                                                                                                  |
|------------------|-----------------------------------------------------------------------------------------------------|----------------|---------------------------------|------------------------------|--------------------------------------------------------------------------------------------------------------------------------------------------------------------------------------------------------------------------------------------------------------------------------------------------------------------------------------------------------------------------------------------------------------------------------------------------|
| <b>AT1G78010</b> | tRNA modification<br>GTPase MnME                                                                    | c 15.2, m 10.4 | Leaves                          | 10.3389/fpls.2014<br>.00678  | AT2G13440, Involved in tRNA processing;<br>AT1G51310, tRNA (5-methylaminomethyl-2-thiouridylate)-<br>methyltransferases                                                                                                                                                                                                                                                                                                                          |
| <b>AT2G13440</b> | tRNA uridine 5-<br>carboxymethylamino<br>methyl modification<br>enzyme MnmG-<br>related             | c 21.4; m 8.7  | Leaves                          | 10.1074/jbc.M308<br>435200   | AT1G78010, tRNA modification GTPase; AT1G51310, tRNA (5-<br>methylaminomethyl-2-thiouridylate)-methyltransferase activity                                                                                                                                                                                                                                                                                                                        |
| <b>AT2G17970</b> | RNA demethylase<br>ALKBH9B/ALKBH<br>10B-like                                                        | n 9.1          | Leaves,<br>flowers,<br>meristem | 10.3389/fpls.2021<br>.701683 | AT4G09980, Methyltransferase MT-A70 family protein; FIP37;<br>AT4G35910, Plays a central role in 2-thiolation of mcm(5)S(2)U at<br>tRNA wobble positions of tRNAs                                                                                                                                                                                                                                                                                |
| <b>AT2G19870</b> | tRNA/rRNA<br>methyltransferase<br>(SpoU) family<br>protein                                          | c 13.6, m 11.2 | Nd                              | /                            | AT4G25730, Adomet-dependent rRNA methyltransferase spb1;<br>AT1G54310, S-adenosyl-L-methionine-dependent methyltransferases<br>superfamily protein; Its function is described as RNA binding;<br>AT5G18570, Functions in the biogenesis of thylakoid membrane and<br>plastid ribosome during chloroplast development;<br>AT4G25730, Probable methyltransferase involved in the maturation<br>of rRNA and in the biogenesis of ribosomal subunits |
| <b>AT2G22090</b> | RNA-binding<br>(RRM/RBD/RNP<br>motifs) family<br>protein                                            | c 7.7; n 7.0   | Leaves,<br>seeds,<br>flowers    | 10.3390/biom100<br>40661     | AT3G56860, Heterogeneous nuclear ribonucleoprotein (hnRNP)-like<br>protein that acts as component of a complex regulating the turnover of<br>mRNAs in the nucleus;<br>AT5G64270, RNA binding splicing factor, putative;<br>AT2G38610, RNA-binding KH domain-containing protein;<br>AT4G11420, RNA-binding component of the eukaryotic translation<br>initiation factor 3                                                                         |
| <b>AT1G32360</b> | Zinc finger (CCCH-<br>type) family protein<br>of the m6A writer<br>complex, interacts<br>with HAKAI | n 8.5          | flowers,<br>seeds, leaves       | 10.3390/ijms2303<br>1572     | AT1G08370 and AT5G13570, mRNA-decapping enzyme-like<br>proteins;<br>AT5G42810, Inositol-pentakisphosphate 2-kinase                                                                                                                                                                                                                                                                                                                               |
| <b>AT2G39670</b> | Ribosomal RNA<br>large subunit<br>methyltransferase<br>RlmN/Cfr                                     | c 21.2, m 3.0  | Leaves,<br>meristem             | /                            | AT1G12800, RNA-binding, OB-fold-like protein;<br>AT2G39670, RNA methyltransferase activity; Involved in rRNA<br>processing; several chloroplast ribosomal RNAs                                                                                                                                                                                                                                                                                   |

|                  |                                                                                                                                      |               |                         |                           |                                                                                                                                                                                                                                                                                                         |
|------------------|--------------------------------------------------------------------------------------------------------------------------------------|---------------|-------------------------|---------------------------|---------------------------------------------------------------------------------------------------------------------------------------------------------------------------------------------------------------------------------------------------------------------------------------------------------|
| <b>AT2G41040</b> | S-adenosyl-L-methionine-dependent methyltransferases superfamily protein                                                             | c 31.2        | Flowers                 | /                         | AT5g03900 and AT1g16080, Uncharacterized proteins; AT1G12250, uncharacterized pentapeptide repeat-containing protein; AT5G13650, putative chloroplastic elongation factor involved in response to chilling stress.                                                                                      |
| <b>AT3G13060</b> | contains YTH (YT521-B homology), an evolutionarily conserved m <sup>6</sup> A-dependent RNA binding domain                           | c 2.7; n 5.5  | Leaves                  | 10.3390/biom10040661      | AT1G02080, Transcription regulator; AT4G00660, DEAD-box ATP-dependent RNA helicase; AT3G27700, RNA recognition motif (RRM)-containing protein; AT1G16210, Uncharacterized protein                                                                                                                       |
| <b>AT3G13180</b> | RNA (C5-cytosine) methyltransferases                                                                                                 | c 20.9; m 6.9 | Leaves                  | 10.1186/s12870-017-1206-0 | AT3G13180, NOL1/NOP2/sun family protein / antitermination NusB domain-containing protein; Its function is described as RNA binding; AT5G15550, Transducin/WD40 repeat-like superfamily protein; Required for maturation of ribosomal RNAs; AT5G04600, RNA-binding (RRM/RBD/RNP motifs) family protein   |
| <b>AT3G13460</b> | The YTH (YT521-B homology) domain has been suggested to be an evolutionarily conserved m <sup>6</sup> A-dependent RNA binding domain | c 1.3; n 3.6  | Meristem, seeds, leaves | 10.7554/eLife.72375       | AT2G25090, CIPK, CBL-interacting serine/threonine-protein kinase 16; AT5G21140, Uncharacterized protein; AT4G38600, HEAT repeat, HECT-domain (ubiquitin-transferase)                                                                                                                                    |
| <b>AT3G21300</b> | (Uracil-5)-methyltransferase family                                                                                                  | c 6.3; m 13.3 | Leaves                  | 10.3390/biom10040661      | AT3G15460 and AT1G52930, Ribosomal rna processing brix domain protein; AT3G13230, RNA-binding KH domain-containing protein                                                                                                                                                                              |
| <b>AT3G23830</b> | Glycine-rich RNA-binding Zinc finger (CCCH-type) protein, induced by cold                                                            | c 11.8; m 8.5 | Meristem                | 10.1007/s10930-013-9504-3 | AT3G03920, Putative H/ACA ribonucleoprotein complex; AT1G52930, Ribosomal rna processing brix domain protein; AT4G29510, Methylates (mono and asymmetric dimethylation) the guanidino nitrogens; AT4G12600, RNA binding ribosomal protein L7Ae; AT1G52930, Ribosomal rna processing brix domain protein |
| <b>AT3G28460</b> | RsmD, chloroplast RNA methyltransferase                                                                                              | c 22.9        | Leaves                  | 10.1093/pcp/pcab060       | AT4G26370, Antitermination NusB domain-containing protein; Its function is described as RNA binding;                                                                                                                                                                                                    |

|                  |                                                                                                           |                     |                           |                               |                                                                                                                                                                                                                                                                                                                                                        |
|------------------|-----------------------------------------------------------------------------------------------------------|---------------------|---------------------------|-------------------------------|--------------------------------------------------------------------------------------------------------------------------------------------------------------------------------------------------------------------------------------------------------------------------------------------------------------------------------------------------------|
|                  |                                                                                                           |                     |                           |                               | AT4G39040, RNA-binding CRS1 / YhbY (CRM) domain protein; Its function is described as RNA binding;<br>AT5G46420, 16S rRNA processing and ribosome binding protein RimM family                                                                                                                                                                          |
| <b>AT3G56330</b> | tRNA methyltransferase, Trm1                                                                              | c 15.8              | Leaves                    | 10.1371/journal.pone.0242737  | AT5G24840, tRNA (guanine-N(7)-)-methyltransferase;<br>AT5G13830, FtsJ-like methyltransferase family protein;<br><br>AT1G15440, Periodic tryptophan protein 2; Involved in nucleolar processing of pre-18S ribosomal RNA;<br>AT5G14520, Pescadillo-like protein; Required for maturation of ribosomal RNAs and formation of the large ribosomal subunit |
| <b>AT4G01880</b> | Trm13 is a tRNA methylase that catalyzes 2'-O-methyladenosine (Am) nucleoside formation on tRNA(Gly)(GCC) | c 4.2; m 5.6        | Leaves, meristem, flowers | 10.1186/s12870-017-1206-0     | AT4G17610, tRNA/rRNA methyltransferase (SpoU) family protein;<br>AT3G26410, nucleic acid binding methyltransferases;<br>AT5G01230, S-adenosyl-L-methionine-dependent 2'-O-ribose methyltransferases superfamily;<br>AT1G36310, S-adenosyl-L-methionine-dependent methyltransferases                                                                    |
| <b>AT4G02940</b> | putative DOXA class oxidative mRNA demethylase (AtALKBH10b)                                               | c 7.0; m 3.7; n 3.3 | Leaves, flowers           | 10.1186/s13059-022-02814-8    | AT4G35910, Adenine nucleotide alpha hydrolases-like superfamily protein;<br>AT3G54170, FIP37;<br>AT4G09980; m6A methyltransferase MTA                                                                                                                                                                                                                  |
| <b>AT4G04880</b> | N6-mAMP deaminase (ADAL, renamed MAPDA)                                                                   | Nd                  | Leaves, flowers           | 10.1080/15476286.2019.1642712 | AT3G26410, tRNA methyltransferase activity;<br>AT4G18905, Transducin/WD40 repeat-like superfamily protein, its function is described as nucleotide binding                                                                                                                                                                                             |
| <b>AT4G24770</b> | 31-kDa RNA binding protein                                                                                | c 26.9              | Leaves                    | 10.1093/jxb/erab165           | AT1G78630, 50S ribosomal protein L13, chloroplastic;<br>AT4G26370, Antitermination NusB domain-containing protein, its function is described as RNA binding;<br>AT3G12930, Protein Iojap, chloroplastic; May be a ribosome silencing factor;<br>AT3G20930, RNA-binding (rrm/rbd/rnp motifs) family protein                                             |
| <b>AT4G34110</b> | PAB poly(A) binding protein 2                                                                             | c 5.7               | Leaves, flowers, meristem | 10.1186/s13059-019-1799-8     | AT1G18070, Translation elongation factor EF1A;<br>AT1G54170, Polyadenylate-binding protein-interacting protein 3;<br>AT4G00660, DEAD-box ATP-dependent RNA helicase 8;<br>AT5G44200, Nuclear cap-binding protein subunit 2                                                                                                                             |

|                  |                                                                          |               |                  |                         |                                                                                                                                                                                                                                                                                                                                 |
|------------------|--------------------------------------------------------------------------|---------------|------------------|-------------------------|---------------------------------------------------------------------------------------------------------------------------------------------------------------------------------------------------------------------------------------------------------------------------------------------------------------------------------|
| <b>AT4G38020</b> | tRNA/rRNA methyltransferase (SpoU) family protein                        | c 9.3; m 3.4  | Leaves           | /                       | AT1G54310, S-adenosyl-L-methionine-dependent methyltransferases;<br>AT1G35680, 50S ribosomal protein L21 and L3-1;<br>AT3G04820, Pseudouridine synthase;<br>AT3G25920, 50S ribosomal protein L15;<br>AT2G41670, P-loop containing nucleoside triphosphate hydrolase                                                             |
| <b>AT5G10620</b> | RNA methyltransferase RlmH                                               | c 19.5        | Leaves, flowers  | /                       | AT5G53920, Ribosomal protein L11 methyltransferase-related;<br>AT1G45110, 16S rRNA (cytidine1402-2'-O)-methyltransferase;<br>AT5G50110, S-adenosyl-L-methionine-dependent RNA methyltransferases;<br>AT5G10910, S-adenosyl-L-methionine-dependent methyltransferase, MraW;<br>AT5G24840, tRNA (guanine-N(7)-)-methyltransferase |
| <b>AT5G10910</b> | CMAL, chloroplast mraW m4C methylase family protein                      | 13.1; m 11.6  | Leaves, meristem | 10.1093/nar/gkaa129     | AT1G64600, Methyltransferases;copper ion binding, contains Ribosomal protein Rsm22;<br>AT1G49400, Uncharacterized protein;<br>AT2G15820, Pentatricopeptide repeat-containing protein;<br>AT1G79850, Plastid ribosomal small subunit protein 17;<br>AT5G64580, Required for plastid development during embryogenesis             |
| <b>AT5G11530</b> | Zinc finger (CCCH-type) family protein                                   | n 7.8         | Seeds            | 10.1073/pnas.1920621117 | AT5G64360, Chaperone DnaJ-domain superfamily protein, its function is described as heat shock protein binding;<br>AT5G58230, Transducin/WD40 repeat-like superfamily protein                                                                                                                                                    |
| <b>AT5G15390</b> | tRNA/rRNA methyltransferase (SpoU) family protein                        | c 19.6; m 3.2 | Leaves           | /                       | AT1G54310, S-adenosyl-L-methionine-dependent methyltransferase;<br>AT4G10650, P-loop containing nucleoside triphosphate hydrolases superfamily protein;<br>AT5G26180, S-adenosyl-L-methionine-dependent methyltransferases superfamily protein                                                                                  |
| <b>AT5G17660</b> | tRNA (guanine-N-7) methyltransferase                                     | c 24.1; n 2.2 | Leaves, flowers  | /                       | AT5G14600, tRNA (adenine-N1-)-methyltransferase;<br>AT2G22400, RNA methyltransferase;<br>AT5G15810, tRNA (guanine(26)-N(2))-dimethyltransferase 1                                                                                                                                                                               |
| <b>AT5G26180</b> | S-adenosyl-L-methionine-dependent methyltransferases superfamily protein | c 7.5; m 6.6  | Meristem, leaves | 10.3390/biom10040661    | AT3G16810, Pumilio (APUM) proteins containing PUF domain (eight repeats of approximately 36 amino acids each). PUF proteins regulate both mRNA stability and translation through sequence-specific binding to the 3' UTR of target mRNA transcripts;<br>AT5G04600, RNA-binding (RRM/RBD/RNP motifs) family protein;             |

|                  |                                                                                   |                      |                           |                               |                                                                                                                                                                                                                                                 |
|------------------|-----------------------------------------------------------------------------------|----------------------|---------------------------|-------------------------------|-------------------------------------------------------------------------------------------------------------------------------------------------------------------------------------------------------------------------------------------------|
|                  |                                                                                   |                      |                           |                               | AT2G40360, Transducin/WD40 repeat-like required for maturation of ribosomal RNAs;<br>AT3G22660, Probable rRNA-processing protein EBP2 homolog                                                                                                   |
| <b>AT5G50110</b> | Ribosomal RNA small subunit methyltransferase G [rsmG]                            | c 10.3; m 8.9        | Leaves, flowers, meristem | /                             | AT1G78010, tRNA modification GTPase;<br>AT3G20557, Hypothetical protein; Involved in the regulation of plant growth                                                                                                                             |
| <b>AT5G58190</b> | YTH (YT521-B homology), evolutionarily conserved m6A-dependent RNA binding domain | c 10.3; n 6.6        | Leaves, flowers, meristem | 10.3390/biom10040661          | AT1G02080, transcription regulator activity;<br>AT2G27100, cap-binding complex (CBC) and both the pre-mRNA splicing and primary microRNAs (miRNAs) processing machinery;<br>AT1G54440, Polynucleotidyl transferase, ribonuclease h fold protein |
| <b>AT5G61020</b> | ECT3 - Evolutionarily conserved C-terminal region 3 (ECT3); YTH domain            | n 6.8                | Meristem, flowers         | 10.1080/15592324.2022.2079308 | AT3G27700, RNA recognition motif (RRM)-containing protein;<br>AT2G39580, Putative zinc-finger domain;<br>AT5G14520, NOP56-like pre RNA processing ribonucleoprotein                                                                             |
| <b>AT5G66360</b> | Ribosomal RNA adenine dimethylase family protein                                  | m 11.9; n 9.2; c 1.6 | Petioles                  | 10.1105/tpc.10.5.699          | AT3G13230, RNA-binding KH domain-containing protein, its function is described as RNA binding;<br>AT4G26600, RNA methyltransferase activity                                                                                                     |



**Supplemental table S2. List of oligonucleotides used in this study. Sequences are shown in 5'****→ 3' direction**

| NAME            | Sequence                                                                                | Purpose                |
|-----------------|-----------------------------------------------------------------------------------------|------------------------|
| ACTIN_FWD       | CTTGCACCAAGCAGCATGAA                                                                    | qRT PCR                |
| ACTIN_REV       | CCGATCCAGACACTGTACTTCCTT                                                                | qRT PCR                |
| ZAT12_FWD       | AAGAAGCCTAACAACGACGC                                                                    | qRT PCR                |
| ZAT12_REV       | AACAAAGCGCGTGTAAACCAA                                                                   | qRT PCR                |
| ZAT10_FWD       | CACAAGGCAAGCCACCGTAAG                                                                   | qRT PCR                |
| ZAT10_REV       | TTGTGCGCCGACGAGGTTGAATG                                                                 | qRT PCR                |
| SOD_FWD         | CTGGTCCACATTTCAACCCC                                                                    | qRT PCR                |
| SOD_REV         | CTTTCCGAGGTCATCAGGGT                                                                    | qRT PCR                |
| APX1_FWD        | TAGGTCTGGCTTCGAAGGTG                                                                    | qRT PCR                |
| APX1_REV        | CAGCAGCGTATTTCTCGACC                                                                    | qRT PCR                |
| CBF2_FWD        | GGCTCCGATTACGAGTCTC                                                                     | Probe for RNA gel blot |
| CBF2_REV        | GCTCCATAAGGACACGTCATC                                                                   | Probe for RNA gel blot |
| RD29A_FWD       | CACACCAGCAGCACCCA                                                                       | Probe for RNA gel blot |
| RD29A_REV       | CCGAGAACAGAGTCAAAGTCC                                                                   | Probe for RNA gel blot |
| COR15A_FWD      | GGCGATGTCTTTCTCAGGAG                                                                    | Probe for RNA gel blot |
| COR15A_REV      | GTGGCATCCTTAGCCTCTC                                                                     | Probe for RNA gel blot |
| MTA PROBE_FWD   | ATGGAAACTGAATCTGATGACGC                                                                 | Probe for RNA gel blot |
| MTA PROBE_REV   | CTCTTTGCTATGGTTGAGCC                                                                    | Probe for RNA gel blot |
| MTB PROBE_FWD   | GAGCATCAAGATCGTGATTCC                                                                   | Probe for RNA gel blot |
| MTB PROBE_REV   | CCAGGAGGTCCACCACC                                                                       | Probe for RNA gel blot |
| HAKAI PROBE_FWD | GAGGGATTCCCCGACGG                                                                       | Probe for RNA gel blot |
| HAKAI PROBE_REV | GACCGTCTCTACCCCGG                                                                       | Probe for RNA gel blot |
| PSAD_FWD        | CCCAAATCCCTCTCCTTAC                                                                     | Probe for RNA gel blot |
| PSAD_REV        | CCTTCTCTTCTGGATTTCGC                                                                    | Probe for RNA gel blot |
| PSAL_FWD        | CAAAATTCATATCCCTGAGAGCCACAAC                                                            | Probe for RNA gel blot |
| PSAL_REV        | TTGACGAAGTAAGGAAGGTCAAGAACG                                                             | Probe for RNA gel blot |
| PETC_FWD        | ATGGCGTCTCATCCCTTCC                                                                     | Probe for RNA gel blot |
| PETC_REV        | GACCACCATGGAGCATCACCA                                                                   | Probe for RNA gel blot |
| ACTIN PROBE_FWD | ATGGCTGATGGTGAAGATATTC                                                                  | Probe for RNA gel blot |
| ACTIN PROBE_REV | CGGTGAACAATCGACGGG                                                                      | Probe for RNA gel blot |
| PSAA_80-MER     | CCACATCTCCATTGAGGATTTCTTGCCCACT<br>ATTGGCCAAACCACCTGAGCACTAGGTCCA<br>ATGTGAGTAGGATCACTC | Probe for RNA gel blot |
| PSAO_80-MER     | ATCTCTCCTCAACCAGTTCTCTCAAAGCA<br>AGTGACTCTTCTCCCGATGCACCGGCGAGTCT<br>CAAAGGGTTCTTGCGC   | Probe for RNA gel blot |
| PSBO_80-MER     | CGTACGTTAGCCTCTTTGGTGCTCCC<br>TCCGCACCGGCCCCGAGACAACGAGA<br>GCAGAGGTGGCTAGAGCAAAACCGGCG | Probe for RNA gel blot |

|                    |                                                                                          |                        |
|--------------------|------------------------------------------------------------------------------------------|------------------------|
| <b>PETB_80-MER</b> | ACTCATATTCCGAAATATACAATGCA<br>GAAAAAATTCGCGGTCTGAACTACCA<br>AAGGAGAATAGGCTAAAATTGTTAGA   | Probe for RNA gel blot |
| <b>PSBA_80-MER</b> | GTTCCCTGATCAAACCTAGAAGTTACC<br>AAGGAACCATGCATAGCACTAAAAAGGGAG<br>CCGCCGAATACACCAGCTACACC | Probe for RNA gel blot |
|                    |                                                                                          |                        |
